# Supplementary material for: Increased Adipose Tissue Expression of Interferon Regulatory Factor (IRF)-5 in Obesity: Association with Metabolic Inflammation
Source: MDPI journal article supplement (doi:10.3390/cells8111418), 2019-11-11
Supplement: s1 [file s1]

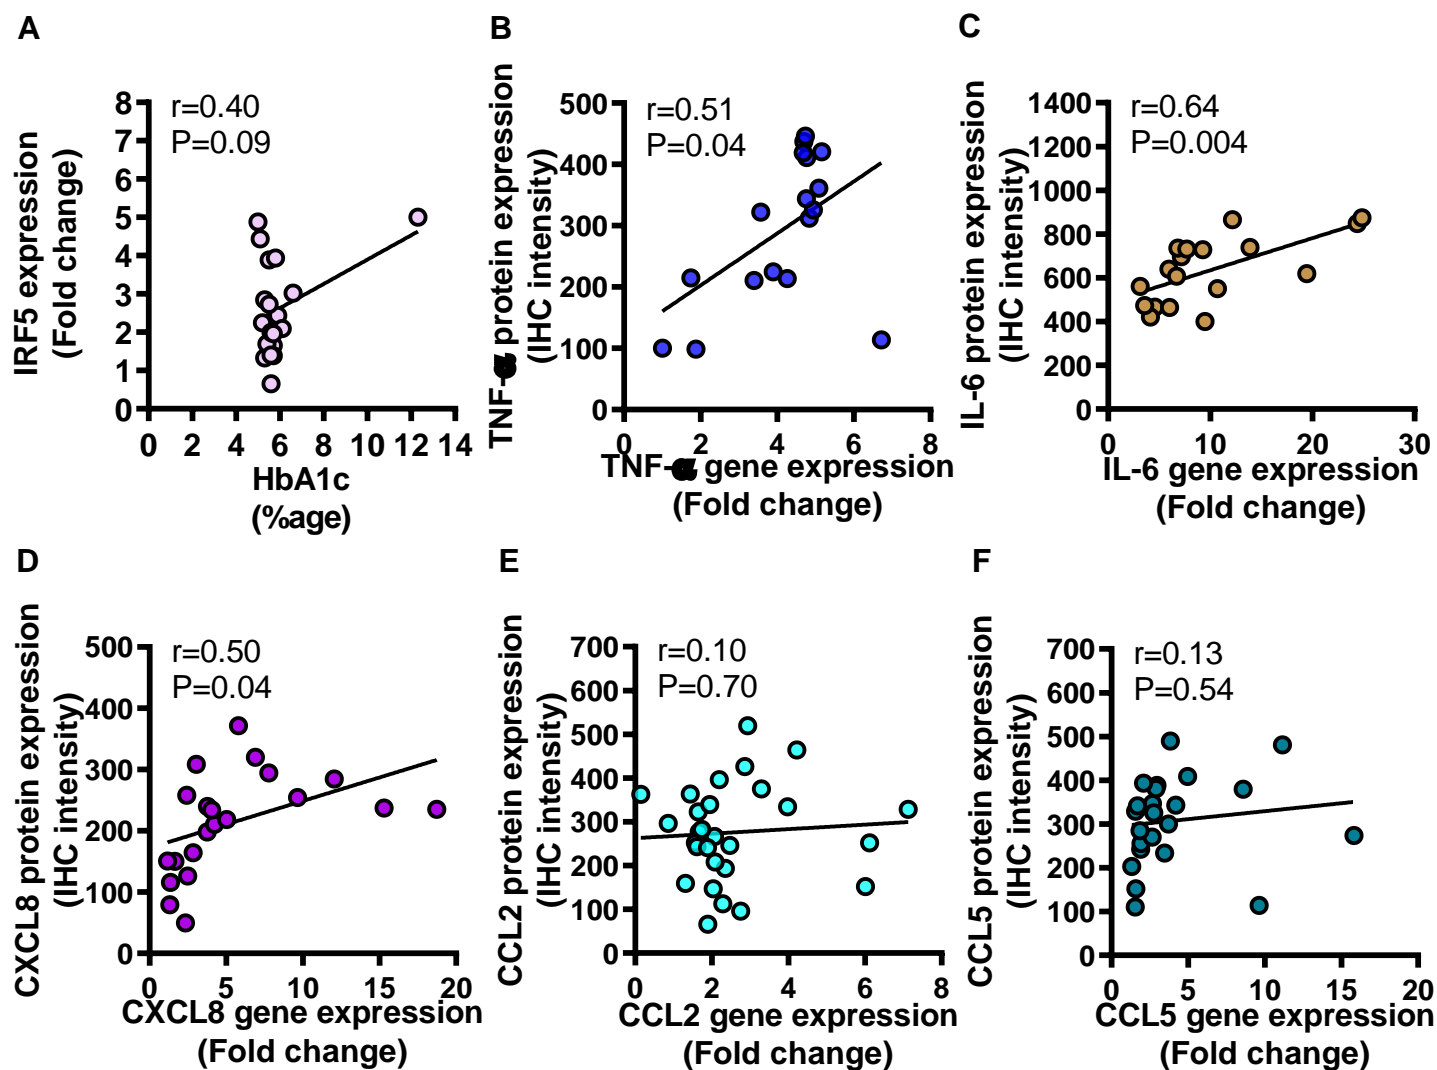

**Figure S1.** Adipose tissue gene expression (expressed as fold change) of IRF5, TNF- $\alpha$ , IL-6, CXCL8, CCL2, and CCL5 was determined by real-time RT-PCR. Adipose tissue protein expression (staining intensity expressed as arbitrary units) of TNF- $\alpha$ , IL-6, CXCL8, CCL2, and CCL5 was assessed by immunohistochemistry (IHC), as described in Materials and Methods. Plasma glycated hemoglobin (HbA1c) levels (expressed as %age) were measured by using Variant™ device (BioRad, Hercules, CA, USA). (A) Association between adipose IRF5 gene expression and HbA1c levels in 18 overweight non-diabetic individuals (BMI: 25-30 kg/m<sup>2</sup>) is shown ( $r=0.40$ ,  $P=0.09$ ). (B) Correlation between adipose gene and protein expression of TNF- $\alpha$  in 17 individuals comprising 5 lean (BMI: <25 kg/m<sup>2</sup>), 5 overweight (BMI: 25-30 kg/m<sup>2</sup>) and 7 obese (BMI: >30 kg/m<sup>2</sup>) is shown ( $r=0.51$ ,  $P=0.04$ ). (C) Correlation between adipose gene and protein expression of IL-6 in 18 individuals comprising 5 lean (BMI: <25 kg/m<sup>2</sup>), 6 overweight (BMI: 25-30 kg/m<sup>2</sup>) and 7 obese (BMI: >30 kg/m<sup>2</sup>) is shown ( $r=0.64$ ,  $P=0.004$ ). (D) Correlation between adipose gene and protein expression of CXCL8 in 21 individuals comprising 6 lean (BMI: <25 kg/m<sup>2</sup>), 8 overweight (BMI: 25-30 kg/m<sup>2</sup>) and 7 obese (BMI: >30 kg/m<sup>2</sup>) is shown ( $r=0.50$ ,  $P=0.04$ ). (E) Correlation between adipose gene and protein expression of CCL2 in 28 individuals comprising 6 lean (BMI: <25 kg/m<sup>2</sup>), 12 overweight (BMI: 25-30 kg/m<sup>2</sup>) and 10 obese (BMI: >30 kg/m<sup>2</sup>) is shown ( $r=0.10$ ,  $P=0.70$ ). (F) Correlation between adipose gene and protein expression of CCL5 in 24 individuals comprising 6 lean (BMI: <25 kg/m<sup>2</sup>), 8 overweight (BMI: 25-30 kg/m<sup>2</sup>) and 10 obese (BMI: >30 kg/m<sup>2</sup>) is shown ( $r=0.13$ ,  $P=0.54$ ).

**Table S1. Primer IDs**

| <b>Immune marker</b> | <b>Primer ID</b> |
|----------------------|------------------|
| IRF3                 | Hs01547283_m1    |
| IRF5                 | Hs00158114_m1    |
| TNF- $\alpha$        | Hs01113624_g1    |
| IL-1 $\beta$         | Hs01555410_m1    |
| IL-6                 | Hs00985639_m1    |
| IL-18                | Hs01038788_m1    |
| IL-23A               | Hs00900828_g1    |
| CXCL8                | Hs00174103_m1    |
| CXCL9                | Hs00171065_m1    |
| CXCL10               | Hs01124251_g1    |
| CCL2                 | Hs00234140_m1    |
| CCL5                 | Hs00982282_m1    |
| CCL7                 | Hs00171147_m1    |
| CCL11                | Hs00237013_m1    |
| CCL19                | Hs00171149_m1    |
| CCR1                 | Hs00928897_s1    |
| CCR2                 | Hs00704702_s1    |
| CCR5                 | Hs99999149_s1    |
| TLR2                 | Hs01872448_s1    |
| TLR4                 | Hs00152939_m1    |
| TLR7                 | Hs01933259_s1    |
| TLR8                 | Hs00152972_m1    |
| TLR9                 | Hs00370913_s1    |
| MyD88                | Hs01573837_g1    |
| IRAK-1               | Hs01018347_m1    |
| CD11c                | Hs00174217_m1    |
| CD68                 | Hs02836816_g1    |
| CD86                 | Hs01567026_m1    |
| CD163                | Hs00174705_m1    |
| CD302                | Hs00994886_m1    |
| GAPDH                | Hs03929097_g1    |
